# Supplementary material for: AtHKT1 gene regulating K+ state in whole plant improves salt tolerance in transgenic tobacco plants
Source: PubMed Central journal article supplement (PMC6224463; doi:10.1038/s41598-018-34660-9), 2018-11-08
Supplement: 41598_2018_34660_MOESM1_ESM.pdf [file 41598_2018_34660_MOESM1_ESM.pdf]

***AtHKT1* gene regulating K<sup>+</sup> state in whole plant improves salt tolerance in transgenic tobacco plants**

**Li Wang<sup>1,2,\*</sup>, Junlian Zhang<sup>1,3,\*</sup>, Yuhui Liu<sup>1,5</sup>, Shoujiang Feng<sup>4</sup>, Zhuoyu Wang<sup>6</sup>,  
Jinwen Zhang<sup>5</sup>, Di Wang<sup>1,5</sup> & Yantai Gan<sup>7</sup>**

<sup>1</sup>Gansu Provincial Key Laboratory of Aridland Crop Science, Gansu Key Laboratory of Crop Genetic and Germplasm Enhancement, Gansu Agricultural University, Lanzhou, 730070, China,

<sup>2</sup>College of Life Science and Technology, Gansu Agricultural University, Lanzhou, 730070, China,

<sup>3</sup>College of Horticulture, Gansu Agricultural University, Lanzhou, 730070, China,

<sup>4</sup>Institute of Soil, Fertilizer and Water-saving Agriculture, Gansu Academy of Agricultural Sciences, Lanzhou, 730070, China,

<sup>5</sup>College of Agronomy, Gansu Agricultural University, Lanzhou, 730070, China,

<sup>6</sup>Centre de Recherche CHUM, Montreal, H2X0A9, Canada, and

<sup>7</sup>Swift Current Research and Development Centre, Agriculture and Agri-Food Canada, Swift Current, S9H3X2, Canada

\*Corresponding. [wangl@gsau.edu.cn](mailto:wangl@gsau.edu.cn) and [zhangjunlian77@163.com](mailto:zhangjunlian77@163.com)

**Keywords:** *AtHKT1*, K<sup>+</sup> steady state, Osmotic balance, Salt tolerance, tobacco

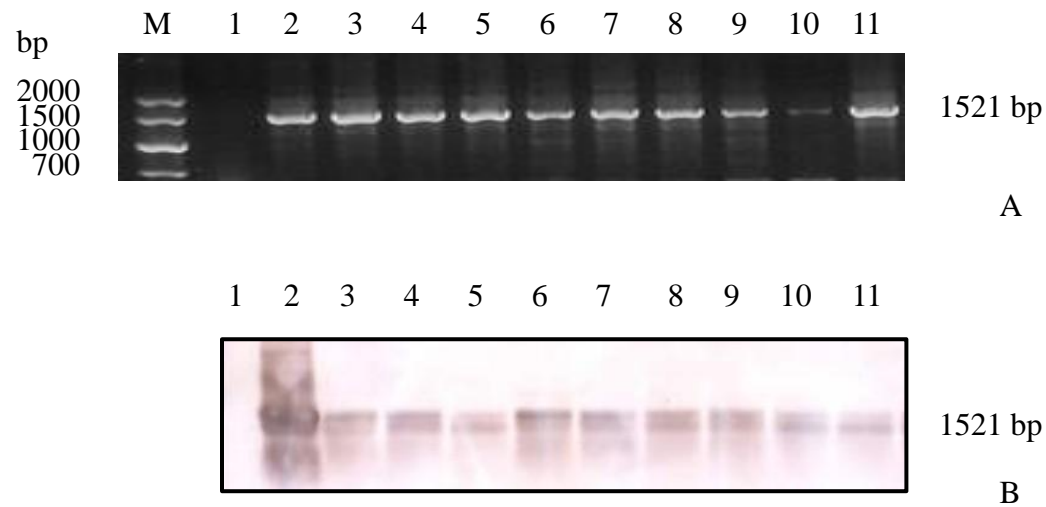

**Figure S1.** Verification of transgenic plants using (A) the PCR assay and (B) PCR-Southern of *AtHKT1* gene. M, DNA Marker V; 1, untransformed tomato plant as a negative control; 2, plasmid *AtHKT1*-GFP as a positive control; 3 to 11, transgenic tobacco lines. Hybridized with a *AtHKT1* probe labeled with digoxigenin. The grouping of gels/blots cropped from same part of the same gel.

**Table S1. Genes primers, PCR and qPCR amplification program**

| Type           | Genes         | Primers                                                                                                                           | Amplification program                                                                                              | Notes                                                   |
|----------------|---------------|-----------------------------------------------------------------------------------------------------------------------------------|--------------------------------------------------------------------------------------------------------------------|---------------------------------------------------------|
| PCR and RT-PCR | <i>AtHKT1</i> | Forward primer:<br>5'-CGGGATCCATGGACAGAGTGG<br>TGGCAAAAATAG-3'<br>Reverse primer:<br>5'-CGCCCGGGTTAGGAAGACGA<br>GGGGTAAAGTATCC-3' | 1 min at 94 °C; 35 cycles of 94 °C for 50 s, 53 °C for 50 s, 72 °C for 120 s, and 10 min final extension at 72 °C. | Cloning of <i>AtHKT1</i> gene                           |
|                | <i>AtHKT1</i> | Forward primer:<br>5'-CGGGATCCATGGACAGAGTGG<br>TGGCAAAAATAG-3'<br>Reverse primer:<br>5'-CGCCCGGGTTAGGAAGACGA<br>GGGGTAAAGTATCC-3' | 1 min at 94 °C; 35 cycles of 94 °C for 50 s, 55 °C for 60 s, 72 °C for 90 s, and 10 min final extension at 72 °C.  | Transgenic plants PCR and RT-PCR detection              |
|                | <i>GFP</i>    | Forward primer:<br>5'-ATGAGTAAAGGAGAACTTTTC<br>-3'<br>Reverse primer:<br>5'-TTATTATTTGTATAGTTCATCC<br>ATG-3'                      | 3 min at 94°C; 35 cycles of 45 s at 94°C, 45 s at 59°C, and 60 s at 72°C, a final stage was for 5 min at 72°C.     | Transgenic plants PCR and RT-PCR detection              |
| qPCR           | <i>AtHKT1</i> | Forward primer:<br>5' - ATC TGG CTC CTA ATC CCT<br>CAA - 3'<br>Reverse primer:<br>5' - CCG TCA CTC CAA GAA GAA<br>CAC - 3'        | 30 s at 95°C; 40 cycles of 5 s at 95°C, and 34 s at 60°C                                                           | Gene expression assays with qPCR                        |
|                | <i>efla</i>   | Forward primer:<br>5'-CAA GGATGA CCC AGC CAA G<br>-3'<br>Reverse primer:<br>5'-TTCCTT ACC TGAACGCCT<br>GT-3'                      | 30 s at 95°C; 40 cycles of 5 s at 95°C, and 34 s at 60°C                                                           | Gene expression assays with qPCR, internal control gene |
